# Supplementary material for: Systematic investigation of the effects of neural stem cell spheroid size and density on fate specification in 3D culture
Source: Royal Society of Chemistry journal article supplement (doi:10.1039/d5tb01589h), 2026-01-01
Supplement: d5tb01589h1.pdf [file d5tb01589h1.pdf]

## SUPPLEMENTARY SECTION

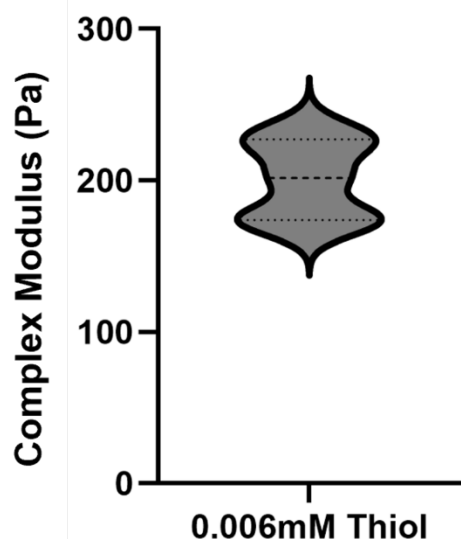

**Supplementary Figure 1:** Before every encapsulation, rheology was conducted on 9mm hydrogels made with the same chemistry as those used for encapsulation to confirm the mechanical properties were maintained. The complex modulus was 201 +/- 11 Pa between all the studies (N=5).

| Target                                | Definition                                                                                                                                                                                                                                                              |
|---------------------------------------|-------------------------------------------------------------------------------------------------------------------------------------------------------------------------------------------------------------------------------------------------------------------------|
| TUNEL Assay                           | This assay employs a method to detect fragmented DNA in apoptotic cells that have undergone 3D cell culture. It incorporates modified dUTP (which is fluorescently tagged) at the 3'-OH end of fragmented DNA, which then can be detected with fluorescence microscopy. |
| LIVE/DEAD™ Fixable Green Kit          | The dye reacts with free amines in both the interior of cells with compromised membranes and on the surface of cells                                                                                                                                                    |
| EdU                                   | EdU (5-ethynyl-2'-deoxyuridine), is a thymidine analog which is incorporated into newly synthesized DNA by cells within a sample over a controlled period                                                                                                               |
| Ki-67                                 | Cellular marker for proliferation because it is present in the cell nucleus during interphase and on the chromosome surface during mitosis                                                                                                                              |
| SOX2                                  | A transcription factor that is important for maintaining pluripotency and had been associated with ribosomal RNA synthesis. Also has a role in maintaining neural stem cell characteristics                                                                             |
| βIII-tubulin                          | A neuronal-specific protein that plays a vital role in the structure and function of neurons. It is involved in neuronal development and can be used as an immature neuronal marker                                                                                     |
| NeuN                                  | Belongs to a family of tissue-specific splicing regulators and is exclusively present in post-mitotic neurons and absent from neural progenitors, oligodendrocytes and astrocytes                                                                                       |
| GFAP                                  | Glial fibrillary acidic protein is an intermediate filament protein that can be used as a marker for astrocytes                                                                                                                                                         |
| Oligodendrocyte Clone NS-1 a.k.a. RIP | Recognizes oligodendrocytes and their myelin sheaths. Stains both early and mature oligodendrocytes                                                                                                                                                                     |

**Supplementary Table 1:** Immunostaining Targets

| Target | Primary Antibody | Dilution (Primary) | Factor |
|--------|------------------|--------------------|--------|
|--------|------------------|--------------------|--------|

|                                       |                                                   |                                    |
|---------------------------------------|---------------------------------------------------|------------------------------------|
| Ki-67                                 | Novus (NB500-170)                                 | 1:100                              |
| SOX2                                  | ThermoFisher Scientific (48-1400)                 | 1:100                              |
| $\beta$ III-tubulin                   | Millipore Sigma (AB9354)                          | 1:1000                             |
| NeuN                                  | Millipore Sigma (MAB377)                          | 1:100                              |
| GFAP                                  | AVES (GFAP)                                       | 1:500                              |
| Oligodendrocyte Clone NS-1 a.k.a. RIP | Millipore Sigma (MAB1580)                         | 1:1000                             |
|                                       |                                                   |                                    |
| <b>Target</b>                         | <b>Secondary Antibody</b>                         | <b>Dilution Factor (Secondary)</b> |
| Mouse                                 | Life Technologies Donkey anti-mouse 488 (A-21202) | 1:500                              |
| Rabbit                                | ThermoFisher Donkey anti-rabbit 555 (A-31572)     | 1:200                              |
| Chicken                               | Sigma Donkey anti-chicken 647 (SAB4600127)        | 1:200                              |
| Hoescht                               | ThermoFisher Scientific (66249)                   | 1:5000                             |

**Supplementary Table 2:** Primary and Secondary Antibody Dilutions

|                                      | <b>Sphere Size</b>        | <b>Global Density</b>     | <b>Interaction</b>        | <b>Figure</b> |
|--------------------------------------|---------------------------|---------------------------|---------------------------|---------------|
| <b>TUNEL</b>                         | F = 15.32<br>$p = 0.0005$ | F = 10.59<br>$p = 0.0028$ | F = 98.57<br>$p < 0.0001$ | 2b            |
| <b>Ki-67</b>                         | F = 0.9<br>ns             | F = 4.2<br>$p < 0.05$     | F = 4.4<br>$p < 0.05$     | 3c            |
| <b>SOX2</b>                          | F = 0.3<br>ns             | F = 4.3<br>$p < 0.05$     | F = 0.6<br>ns             | 4c            |
| <b><math>\beta</math>III-tubulin</b> | F = 13.8<br>$p < 0.0005$  | F = 26.3<br>$p < 0.0001$  | F = 18.6<br>$p < 0.0001$  | 5e            |
| <b>NeuN</b>                          | F < 0.001<br>ns           | F = 0.2<br>ns             | F = 10.1<br>$p < 0.005$   | 5f            |
| <b>GFAP</b>                          | F = 1.6<br>ns             | F = 30.0<br>$p < 0.0001$  | F = 3.5<br>$p < 0.05$     | 6b            |
| <b>RIP</b>                           | F = 6.4<br>$p < 0.05$     | F = 4.2<br>$p < 0.05$     | F = 24.6<br>$p < 0.0001$  | 7b            |

**Supplementary Table 3:** ANOVA values (F and  $p$ ) for sphere size (column factor), global density (row factor) and interaction factor for all image quantification
